# Supplementary material
Source: publisher figshare collection journal article supplement (https://future-science-group.figshare.com/ndownloader/files/30820924)
Supplement: Supplementary file 1 [file 30820924]

## Sheet: Unique
Urine miRNAs significantly different compared to Ta and unique to specific embedded metal pellets
Metal Embedded	miRNAs	Higher	Lower	Early Marker (1 mo)	Late Marker (12 mo)	Pos. Corr. to Metal Conc.	Neg. Corr. to Metal Conc.	Tissue-specificity	Diff. from Background	Score
W	let-7e-5p	X			X		X		q=0.05	4
	let-7g-5p	X		X					NS	2
	miR-10b-5p	X							**	2
	miR-125a-5p	X						Cerebellum	*	2
	miR-146b-5p	X		X				Jejunum	*	3
	miR-181a-5p	X					X		NS	2
	miR-194-5p	X			X		X		*	4
	miR-203a-3p	X		X				Jejunum, Ileum	NS	2
	miR-27a-3p	X		X		X		Heart, Soleus	**	4
	miR-342-3p	X		X					**	3
	miR-374-5p		X					Pancreas	NS	1
	miR-741-3p		X		X			Testicles	NS	2
	miR-743a-3p		X					Testicles	NS	1
	miR-871-3p		X		X	X		Testicles	NS	3
Co	let-7e-5p	X							NS	1
	let-7g-5p		X						NS	1
	let-7i-5p		X					Cerebellum	NS	1
	miR-124-3p		X		X				NS	2
	miR-143-3p	X					X	Jejunum, Ileum	*	3
	miR-16-5p	X						Testicles	NS	1
	miR-192-5p		X	X			X	Jejunum, Ileum	NS	3
	miR-200b-5p		X			X		Jejunum, Ileum	NS	2
	miR-203a-3p	X					X	Jejunum, Ileum	NS	2
	miR-203b-3p		X	X			X	Cortex, Kidney	NS	3
	miR-26a-5p		X					Cerebellum	NS	1
	miR-26b-3p		X		X			Liver	NS	2
	miR-26b-5p	X						Liver	NS	1
	miR-27a-3p	X							**	2
	miR-27b-3p	X				X		Pancreas	NS	2
	miR-30a-5p		X	X				Medulla	NS	2
	miR-664-1-5p		X		X			Pancreas	NS	2
	miR-664-2-5p		X		X				NS	2
Fe	miR-103-3p		X						*	2
	miR-148a-5p		X						NS	1
	miR-423-5p	X						Liver	*	2
	miR-125b-5p	X			X	X			NS	3
	miR-146b-5p		X		X			Jejunum	NS	2
	miR-6216		X		X				NS	2
	miR-709		X		X				NS	2
Cu	miR-29a-3p		X	X					NS	2
	miR-320-3p		X	X				Pancreas	NS	2
	let-7b-5p		X					Pancreas	NS	1
	let-7d-5p		X					Cerebellum	NS	1
	miR-200b-3p		X			X		Jejunum, Ileum	NS	2
	miR-27a-3p		X						NS	1
	miR-30c-2-3p	X							NS	1
	miR-125a-5p	X						Cerebellum	NS	1
	miR-221-3p		X					Hippocampus	NS	1
	miR-30b-5p		X					Liver	NS	1
	miR-7a-5p		X						NS	1
	miR-99b-5p	X							*	2
	miR-183-5p		X		X		X		NS	3
Al	let-7c-5p		X	X					NS	2
	miR-125a-5p	X		X				Cerebellum	*	3
	miR-16-5p		X	X		X		Testicles	NS	3
	miR-200a-3p		X	X					NS	2
	miR-21-5p		X	X				Liver	NS	2
	miR-34c-5p		X	X				Testicles	NS	2
	miR-743b-3p		X	X				Testicles	NS	2
	miR-7a-5p		X	X		X			NS	3
	miR-3068-3p	X							**	2
	miR-3473	X							NS	1
	miR-151-3p	X			X				q=0.05	3
	miR-151-5p	X			X			Liver	q=0.05	3
	miR-181a-5p	X			X				NS	2
	miR-22-3p	X			X			Heart	q=0.05	3
	miR-23a-3p	X			X			Heart, Muscle	q=0.05	3
	miR-23b-3p	X			X			Pancreas	NS	2
	miR-27a-3p	X			X	X		Heart, Muscle	q=0.05	4
	miR-27b-3p	X			X	X		Pancreas	q=0.05	4
	miR-30e-5p	X			X	X		Heart	NS	3
Pb	miR-362-5p	X		X				Liver	*	3
	let-7a-5p		X						NS	1
	miR-148a-3p		X						NS	1
	miR-221-5p		X					Hippocampus	NS	1
	miR-3473	X							NS	1
	miR-664-1-5p	X					X	Pancreas	*	3
	let-7g-5p		X		X				NS	2
	miR-148b-3p		X		X			Pancreas	q=0.05	3
	miR-184	X			X				*	3
DU	miR-133b-3p		X	X				Muscle	*	3
	miR-191a-5p	X		X				Jejunum, Ileum	**	3
	miR-200b-5p	X		X			X	Jejunum, Ileum	**	4
	miR-423-5p	X		X				Liver	**	3
	miR-92a-3p	X		X					**	3
	miR-10b-5p	X							NS	1
	miR-125b-1-3p		X					Brainstem	NS	1
	miR-6216		X						NS	1
	miR-29a-3p		X		X		X		NS	3
	miR-3473	X			X				NS	2
	miR-378a-3p	X			X			Muscle	NS	2

## Sheet: Common
Urine miRNAs significantly different compared to Ta and common to all embedded metal pellets
miRNAs	Higher Than Ta	Lower Than Ta	Tissue-specificity
miR-192-5p	3 months		Jejunum, Ileum
miR-203a-3p	3 months		Jejunum, Ileum
miR-203b-3p	3 months		Cortex, Kidney
miR-26b-5p		3 months	Liver
miR-28-3p	3 months		Liver
Let-7c-5p		12 months	Pancreas
